# Supplementary material
Source: PubMed Central journal article supplement (PMC2788874)

## Supplemental Figures

**Fig. S1:** The CTD of  $\beta$ -catenin shows no obvious interaction partners by metabolic labeling analysis. HEK293T cells were transfected with a construct encoding arm repeats 10-12 and the unstructured CTD (Arm10CTD). After 36 hours, cells were labeled for 3 hours with 200 $\mu$ Ci  $^{35}$ [S]-methionine/cysteine, lysed and immunoprecipitated with the Flag antibody. Untransfected HEK293T cells (parental) served as a control.

**Fig. S2:**  $\beta$ -catenin monoclonal antibody M5.1 recognizes an epitope that is masked in the cytoplasmic compartment of Wnt3a activated L cell fibroblasts. (A) Schematic of  $\beta$ -catenin with antibody recognition domains shown. (B) Epitope mapping of  $\beta$ -catenin CTD antibodies, M5.1 (kindly provided by Jean Luc Teillard, Jussieu University, France) and clone 14 (BD Biosciences) after transfection of HEK293T cells with  $\beta$ -catenin CTD truncation constructs  $\Delta$ 751, 723 and 695. Deletion constructs were made within an oncogenic  $\beta$ -catenin backbone (S33Y) to compensate for the reduced accumulation observed for CTD deleted forms of  $\beta$ -catenin (Frank Kolligs, personal communication; (1)). (C) Immunostaining of cadherin-negative, mouse L cell fibroblasts lacking (control) or stably expressing Wnt3a. Both M.5 and 1.1.1 antibodies recognize a single species that perfectly comigrates with  $\beta$ -catenin in Wnt3a activated L cells (not shown), as previously demonstrated (2).

**Fig. S3:**  $\beta$ -catenin lacking the CTD shows enhanced interaction with phosphorylated ligands.  $10^6$  HEK293T cells were transfected with 1.0 (1) and 0.5 $\mu$ g (2) of flag-tagged full length (full) or CTD-truncated  $\beta$ -catenin ( $\Delta$ 695). Empty pcDNA plasmid was transfected as a control. After 36 hours, cells were labeled for 4 hours with 250 $\mu$ Ci  $^{32}$ [P]-orthophosphate, lysed and immunoprecipitated with the flag antibody. Half of each sample was subjected to SDS-PAGE and immunoblot analysis; the other gel was dried and exposed to film.

### Supplemental References

1. Kolligs, F. T., Hu, G., Dang, C. V., and Fearon, E. R. (1999) *Molecular and cellular biology* **19**(8), 5696-5706
2. Gottardi, C. J., and Gumbiner, B. M. (2004) *J Cell Biol* **167**(2), 339-349

Supplemental Figure 1.

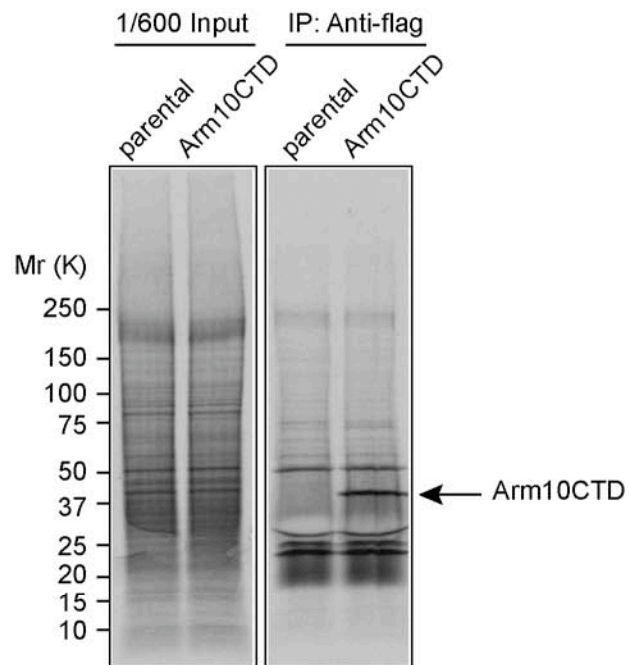

Supplemental Figure 2.

A.

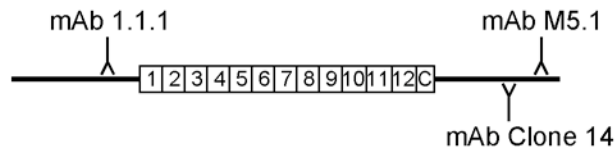

B.

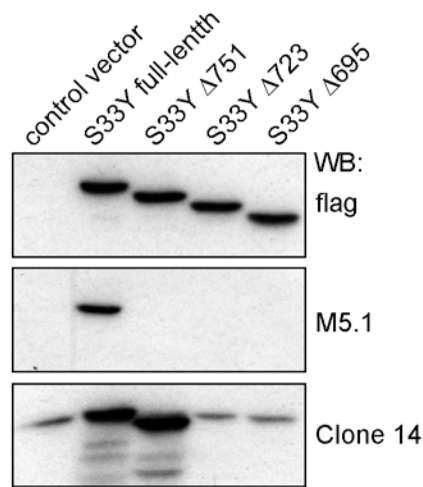

C.

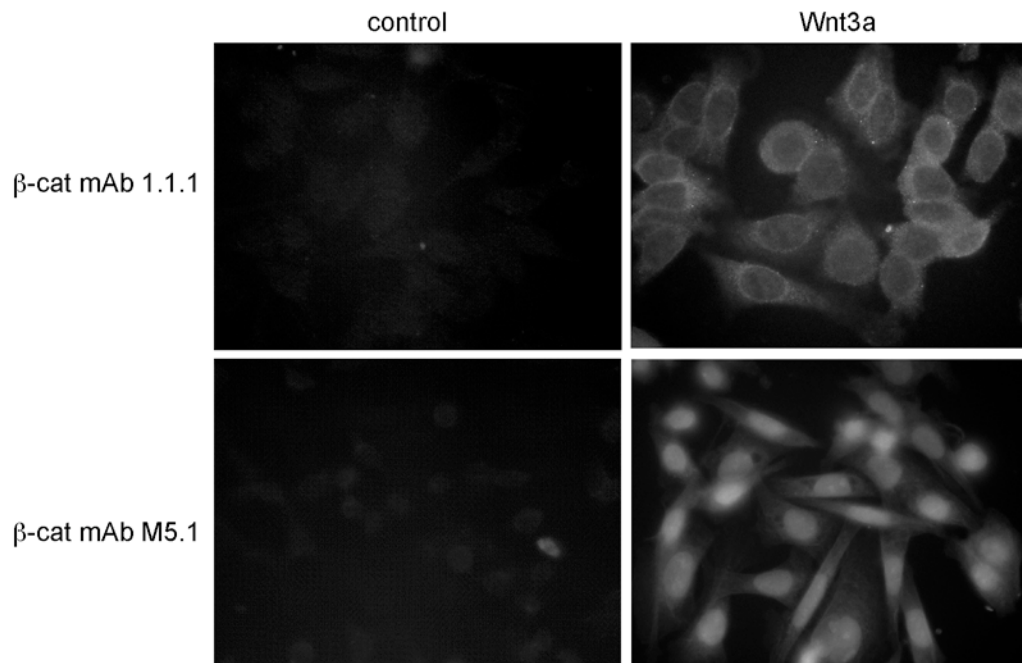

Supplemental Figure 3.

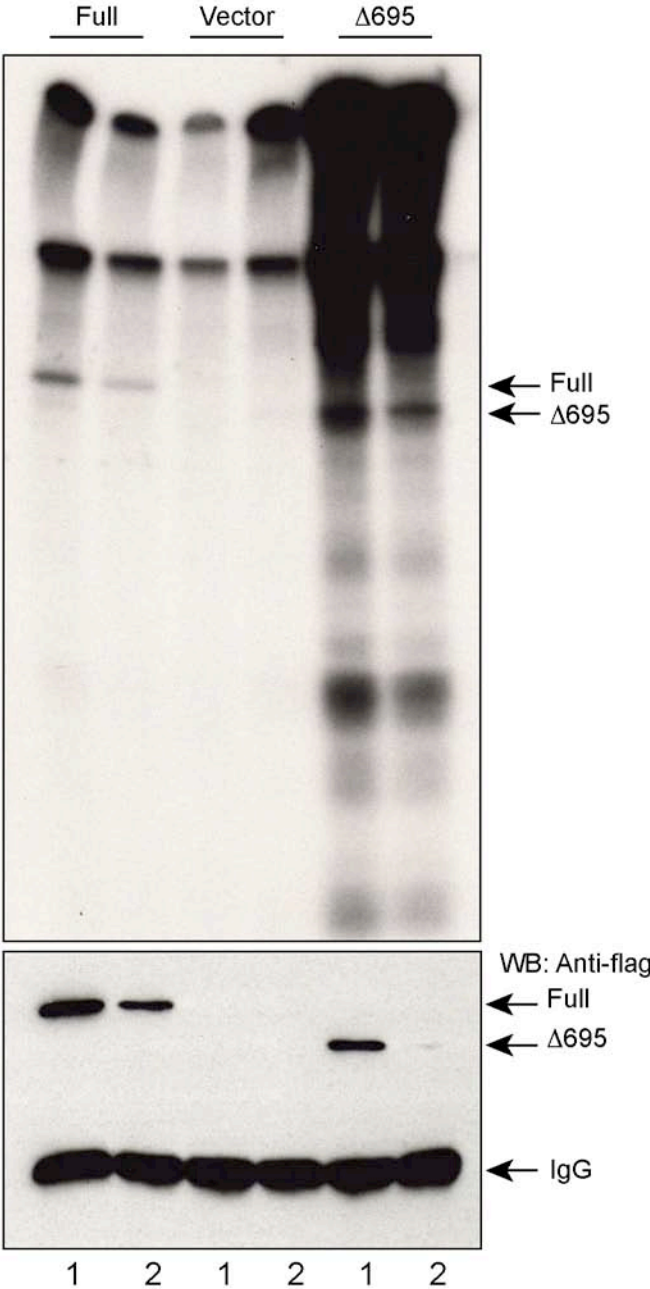

Supplement: supp_M109.045039_jbc.M109.045039-1.pdf [file supp_M109.045039_jbc.M109.045039-1.pdf]
